# Supplementary material
Source: publisher figshare collection journal article supplement (https://asha.figshare.com/articles/dataset/_/25582980)
Supplement: Supplementary file 1 [file 1]

Supplemental Material S2. Results of sensitivity analysis for age groups.

Table S2.1. Participants and mean per age group.

|                    | High-burden subgroup |                         | Low-burden subgroup |                         |
|--------------------|----------------------|-------------------------|---------------------|-------------------------|
|                    | <i>n</i>             | <i>M</i> <sub>age</sub> | <i>n</i>            | <i>M</i> <sub>age</sub> |
| 18–24 years        | 45                   | 21.78                   | 28                  | 21.61                   |
| 25–39 years        | 84                   | 31.86                   | 101                 | 31.74                   |
| 40–54 years        | 64                   | 46.27                   | 95                  | 47.31                   |
| 55–69 years        | 29                   | 61.00                   | 119                 | 62.39                   |
| 70 years and older | 8                    | 73.38                   | 29                  | 74.90                   |
| Total data         | 230                  | 39.01                   | 372                 | 48.36                   |

Table S2.2. Differences between age groups on the four impact-variables.

|           |      | 18–24 years |                 | 25–39 years |                 | 40–54 years |                 | 55–69 years |                 | > 70 years |                 |
|-----------|------|-------------|-----------------|-------------|-----------------|-------------|-----------------|-------------|-----------------|------------|-----------------|
|           |      | <i>M</i>    | <i>p</i> -value | <i>M</i>   | <i>p</i> -value |
| Frequency | High | 3.53        | .000            | 3.60        | .000            | 3.41        | .000            | 3.13        | .000            | 3.50       | .000            |
|           | Low  | 2.36        |                 | 1.91        |                 | 1.84        |                 | 1.87        |                 | 1.48       |                 |
| Severity  | High | 6.07        | .000            | 6.06        | .000            | 5.77        | .000            | 5.38        | .000            | 5.88       | .000            |
|           | Low  | 3.54        |                 | 3.02        |                 | 3.01        |                 | 3.04        |                 | 2.83       |                 |
| Affect    | High | 6.91        | .000            | 6.86        | .000            | 6.47        | .000            | 6.38        | .000            | 7.13       | .000            |
|           | Low  | 3.14        |                 | 2.85        |                 | 2.84        |                 | 2.76        |                 | 2.41       |                 |
| Anxiety   | High | 2.71        | .014            | 2.83        | .000            | 2.45        | .001            | 2.31        | .004            | 2.62       | .005            |
|           | Low  | 2.11        |                 | 1.73        |                 | 1.95        |                 | 1.80        |                 | 1.72       |                 |

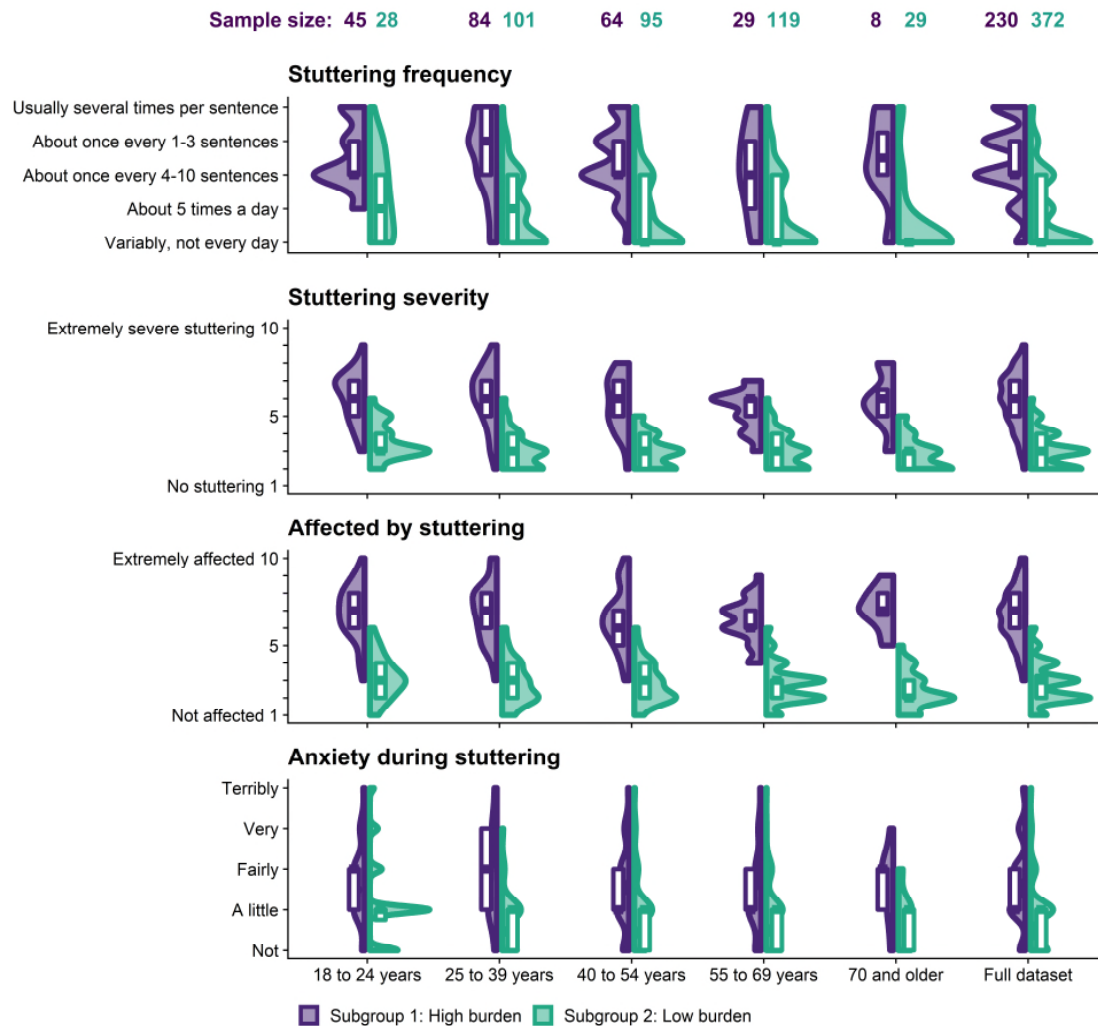

**Figure S2.1.** Distributions of the four impact variables in the high- and low-burden subgroups, in the five age groups and the full dataset. Violin plots show the distributions of scores for the high-burden subgroup (in purple) and low-burden subgroup (in green). Boxplots show median and first and third quartiles. The top row shows the sample sizes in the different age groups and the full dataset.

**Table S2.3.** Different types of anxiety per age group and per subgroup (high-/low-burden).

|                               |           | 18–24 years    |       | 25–39 years    |        | 40–54 years    |        | 55–69 years    |        | > 70 years     |       |
|-------------------------------|-----------|----------------|-------|----------------|--------|----------------|--------|----------------|--------|----------------|-------|
|                               | Sub group | Total <i>n</i> | %     | Total <i>n</i> | %      | Total <i>n</i> | %      | Total <i>n</i> | %      | Total <i>n</i> | %     |
| Anxiety for letters or sounds | High      | 45             | 53.3  | 84             | 41.7   | 64             | 31.2   | 29             | 20.7   | 8              | 62.5  |
|                               | Low       | 28             | 21.4* | 101            | 29.7** | 95             | 24.2   | 119            | 21.8   | 29             | 13.8* |
| Anxiety for situations        | High      | 45             | 80.0  | 84             | 75.0   | 64             | 60.9   | 29             | 58.6   | 8              | 75.0  |
|                               | Low       | 28             | 67.9  | 101            | 44.6** | 95             | 49.5   | 119            | 43.7   | 29             | 24.1* |
| Anxiety for people            | High      | 45             | 62.2  | 84             | 58.3   | 64             | 53.1   | 29             | 51.7   | 8              | 62.5  |
|                               | Low       | 28             | 46.4  | 101            | 21.8** | 95             | 25.3** | 119            | 23.5** | 29             | 24.1  |
| Anxiety for telephoning       | High      | 45             | 62.2  | 84             | 65.5   | 64             | 39.1   | 29             | 31.0   | 8              | 25.0  |
|                               | Low       | 28             | 35.7* | 101            | 23.8** | 95             | 22.1*  | 119            | 20.2   | 29             | 17.2  |

\* $p < .05$ . \*\* $p < .01$ .

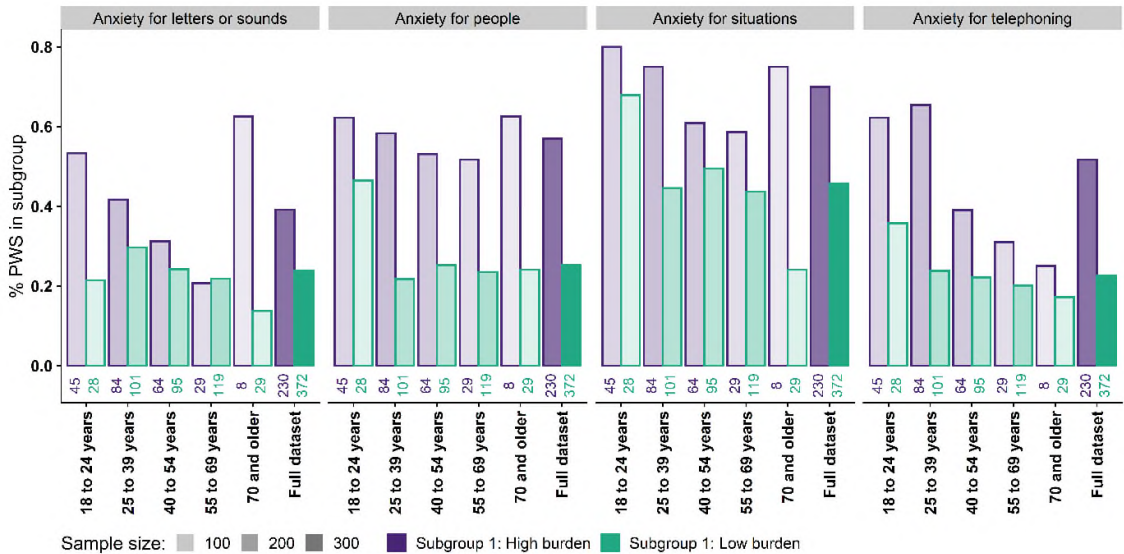

**Figure S2.2.** Frequency of different types of anxiety per age group and per subgroup (high-/low-burden).

**Table S2.4.** Scores on followed therapies per age group and per subgroup (high-/low-burden).

|                                    |           | 18–24 years    |      | 25–39 years    |       | 40–54 years    |       | 55–69 years    |       | > 70 years     |      |
|------------------------------------|-----------|----------------|------|----------------|-------|----------------|-------|----------------|-------|----------------|------|
|                                    | Sub group | Total <i>n</i> | %    | Total <i>n</i> | %     | Total <i>n</i> | %     | Total <i>n</i> | %     | Total <i>n</i> | %    |
| Speech language therapy as a child | High      | 45             | 77.8 | 84             | 85.7  | 64             | 84.4  | 29             | 69.0  | 8              | 50.0 |
|                                    | Low       | 28             | 50.0 | 101            | 76.2  | 95             | 84.3  | 119            | 55.5  | 29             | 75.9 |
| Speech language therapy            | High      | 45             | 73.3 | 84             | 72.6  | 64             | 57.8  | 29             | 62.1  | 8              | 25.0 |
|                                    | Low       | 28             | 67.9 | 101            | 64.4  | 45             | 52.6  | 119            | 62.2  | 29             | 48.3 |
| Stuttering program                 | High      | 45             | 26.6 | 84             | 45.2  | 64             | 51.6  | 29             | 51.7  | 8              | 37.5 |
|                                    | Low       | 28             | 14.3 | 101            | 25.7* | 95             | 37.9* | 89             | 25.2* | 29             | 10.3 |
| Other                              | High      | 45             | 17.7 | 84             | 61.7  | 64             | 45.3  | 29             | 37.9  | 8              | 37.5 |
|                                    | Low       | 25             | 10.7 | 101            | 23.8  | 95             | 30.5  | 119            | 33.6  | 29             | 34.5 |

\**p* < .05. \*\**p* < .01.

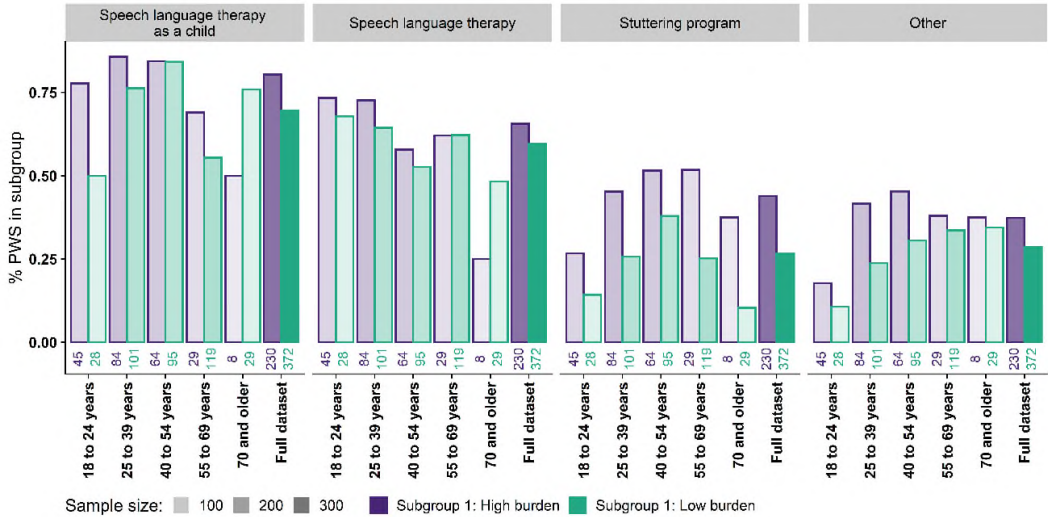

**Figure S2.3.** Frequency of followed therapies per age group and per subgroup (high-/low-burden).

**Table S2.5.** Impact of stuttering on education and employment per age group and per subgroup (high-/low-burden)

|                                             |           | 18–24 years    |      | 25–39 years    |        | 40–54 years    |        | 55–69 years    |       | > 70 years     |      |
|---------------------------------------------|-----------|----------------|------|----------------|--------|----------------|--------|----------------|-------|----------------|------|
|                                             | Sub group | Total <i>n</i> | %    | Total <i>n</i> | %      | Total <i>n</i> | %      | Total <i>n</i> | %     | Total <i>n</i> | %    |
| Reported impact on educational level (yes)  | HB        | 45             | 22.2 | 84             | 31.0   | 64             | 43.8   | 29             | 51.7  | 8              | 37.5 |
|                                             | LB        | 28             | 7.1  | 101            | 20.8   | 95             | 33.7   | 119            | 37.0  | 29             | 31.0 |
| Reported impact on career development (yes) | HB        | 45             | 55.6 | 84             | 75.0   | 64             | 84.4   | 29             | 69.0  | 8              | 37.5 |
|                                             | LB        | 28             | 35.7 | 101            | 41.6** | 95             | 48.4** | 119            | 55.5  | 29             | 41.4 |
| Reported impact on finding a job            | HB        | 45             | 46.7 | 84             | 61.9   | 64             | 70.3   | 29             | 51.7  | 8              | 37.5 |
|                                             | LB        | 28             | 21.4 | 101            | 28.7** | 95             | 40.0** | 119            | 37.0* | 29             | 20.7 |

Note. HB = high-burden subgroup; LB = low-burden subgroup.

\**p* < .05. \*\**p* < .01.

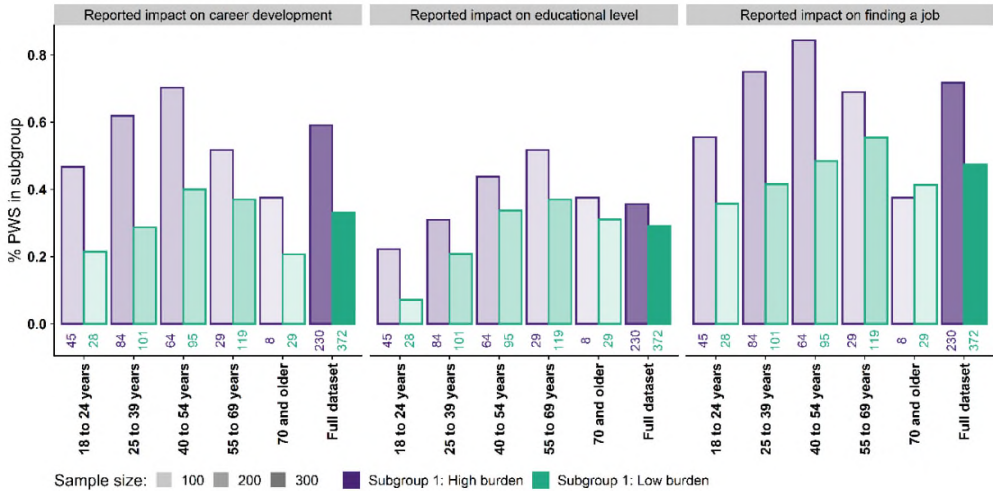

**Figure S2.4.** Impact of stuttering on education and employment per age group and per subgroup (high-/low-burden).

**Table S2.6.** Differences between age groups and subgroups on depression, anxiety, stress, and the overall impact of stuttering.

|                          | Subgroups | 18–24 years |                 | 25–39 years |                 | 40–54 years |                 | 55–69 years |                 | > 70 years |                 |
|--------------------------|-----------|-------------|-----------------|-------------|-----------------|-------------|-----------------|-------------|-----------------|------------|-----------------|
|                          |           | <i>M</i>    | <i>p</i> -value | <i>M</i>   | <i>p</i> -value |
| DASS Depression          | HB        | 7.18        | .502            | 8.10        | .000            | 5.30        | .278            | 5.67        | .194            | 2.38       | .407            |
|                          | LB        | 5.76        |                 | 4.08        |                 | 4.22        |                 | 4.05        |                 | 5.42       |                 |
| DASS Anxiety             | HB        | 7.78        | .299            | 6.37        | .000            | 4.24        | .393            | 4.60        | .015            | 2.25       | .410            |
|                          | LB        | 5.72        |                 | 2.78        |                 | 3.58        |                 | 2.52        |                 | 4.27       |                 |
| DASS Stress              | HB        | 9.47        | .895            | 10.76       | .004            | 8.70        | .204            | 8.34        | .080            | 5.88       | .578            |
|                          | LB        | 9.20        |                 | 7.31        |                 | 7.30        |                 | 6.10        |                 | 7.79       |                 |
| OASES Total impact score | HB        | 2.69        | .026            | 2.72        | .000            | 2.59        | .000            | 2.52        | .002            | 2.79       | .001            |
|                          | LB        | 2.29        |                 | 2.10        |                 | 2.12        |                 | 2.12        |                 | 2.01       |                 |

*Note.* HB = high-burden subgroup; LB = low-burden subgroup.

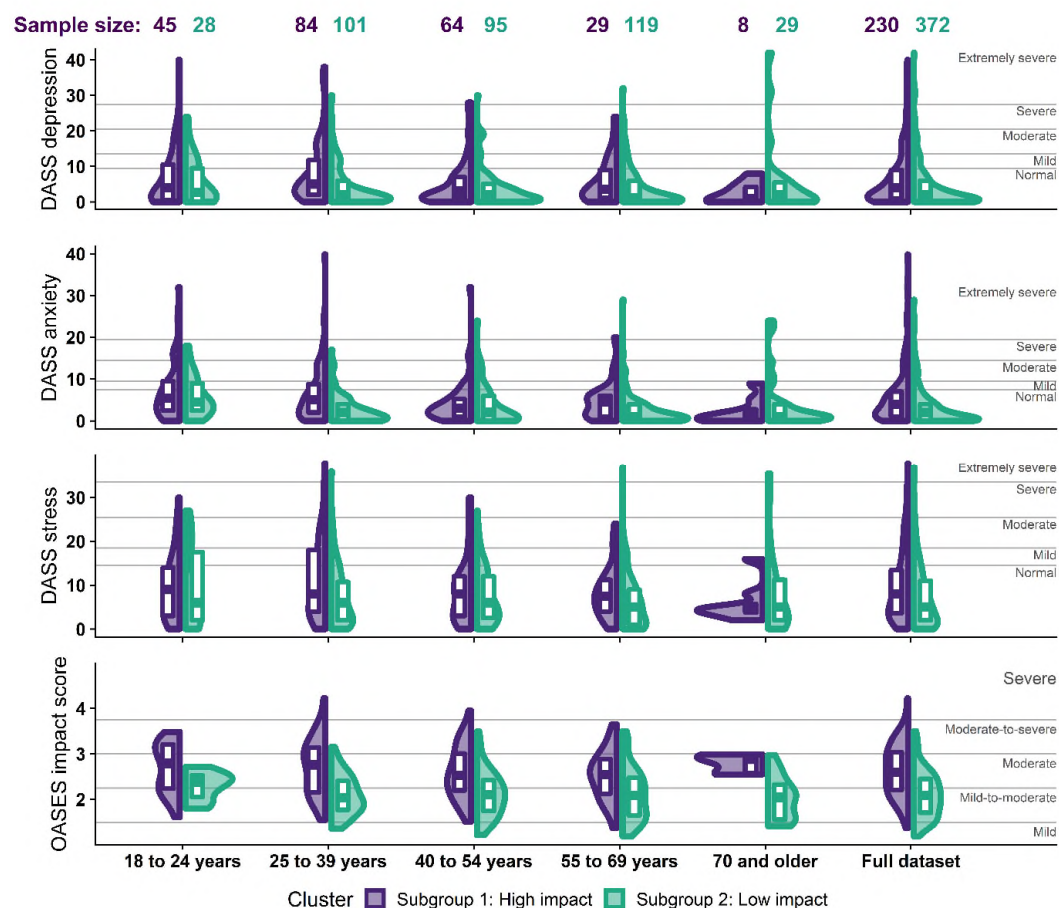

**Figure S2.5.** Distributions of DASS for depression, anxiety, and stress, and the OASES overall impact score of stuttering in the high- and low-burden subgroups, in the five age groups and the full dataset. Violin plots show the distributions of scores for the high-burden subgroup (in purple) and low-burden subgroup (in green). Boxplots show median and first and third quartiles. The top row shows the sample sizes in the different age groups and the full dataset.
